# Supplementary material for: Therapeutic radiation for childhood cancer drives structural aberrations of NF2 in meningiomas
Source: PubMed Central journal article supplement (PMC5543118; doi:10.1038/s41467-017-00174-7), 2017-08-04
Supplement: 41467_2017_174_MOESM1_ESM.pdf [file 41467_2017_174_MOESM1_ESM.pdf]

File Name: Supplementary Information

Description: Supplementary Figures

File Name: Supplementary Data 1

Description: Patient clinical data for the primary radiation-induced meningioma cohort.

File Name: Supplementary Data 2

Description: Mutect mutation calls from whole exome sequencing.

File Name: Supplementary Data 3

Description: GISTIC 2.0 significant copy number alterations detected by WES.

File Name: Supplementary Data 4

Description: Tophat2 identified gene fusion candidates.

File Name: Supplementary Data 5

Description: IDT capture probe panel for targeted sequencing.

File Name: Supplementary Data 6

Description: Mutect mutation calls from targeted sequencing of RIMs and sporadic meningiomas.

File Name: Supplementary Data 7

Description: Targeted sequencing reads supporting NF2 rearrangements.

File Name: Supplementary Data 8

Description: Clinical data and mutation profile of meningioma targeted sequencing.

File Name: Supplementary Data 9

Description: Summary of NF2 fusions/breakpoint and copy number alterations.

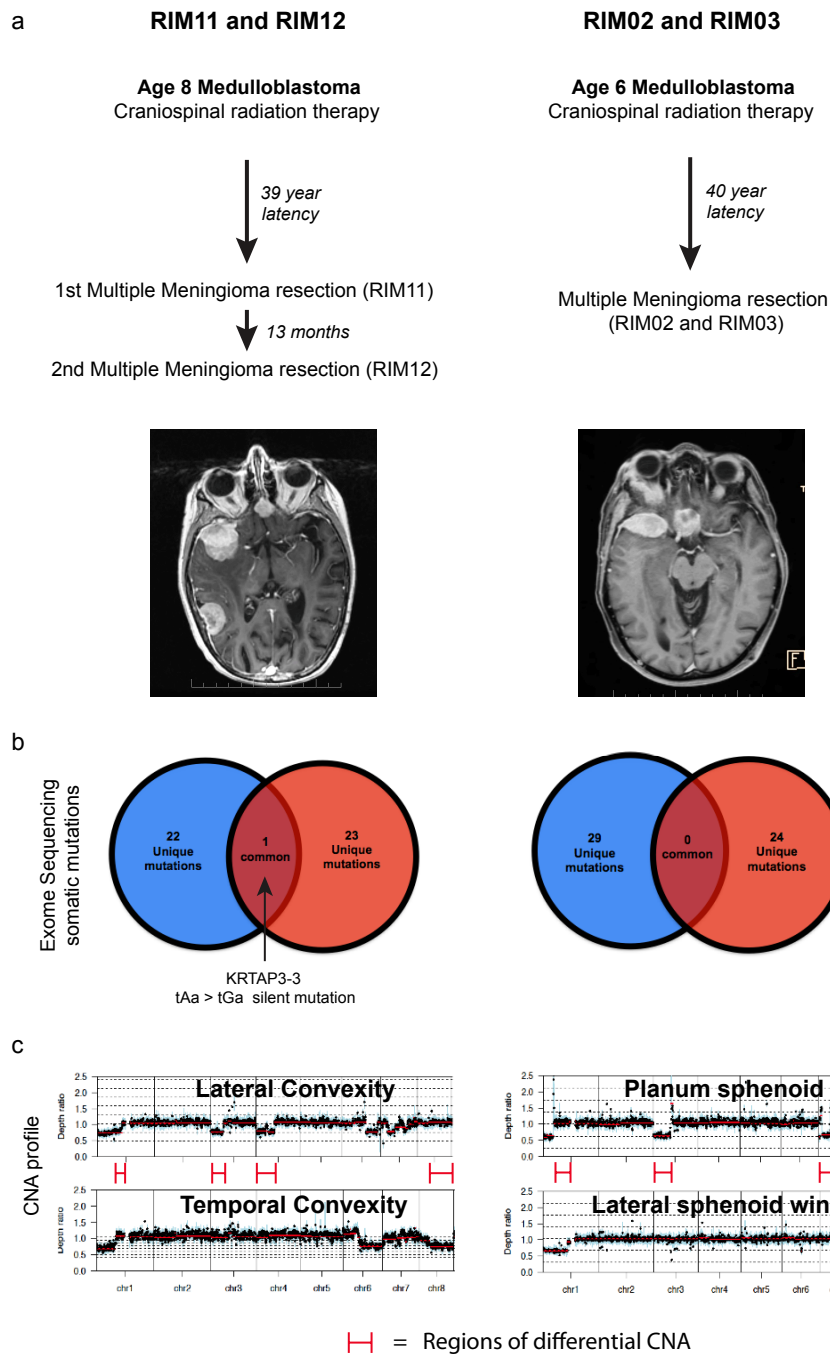

**Supplementary Figure 1**

**Characterization of multiple radiation-induced meningioma cases from single patients.**

**(a).** Clinical timeline of radiation therapy to meningioma resection. **(b)** Somatic focal mutations detected by exome sequencing **(c)** CNA profiles as determined by exome sequencing.

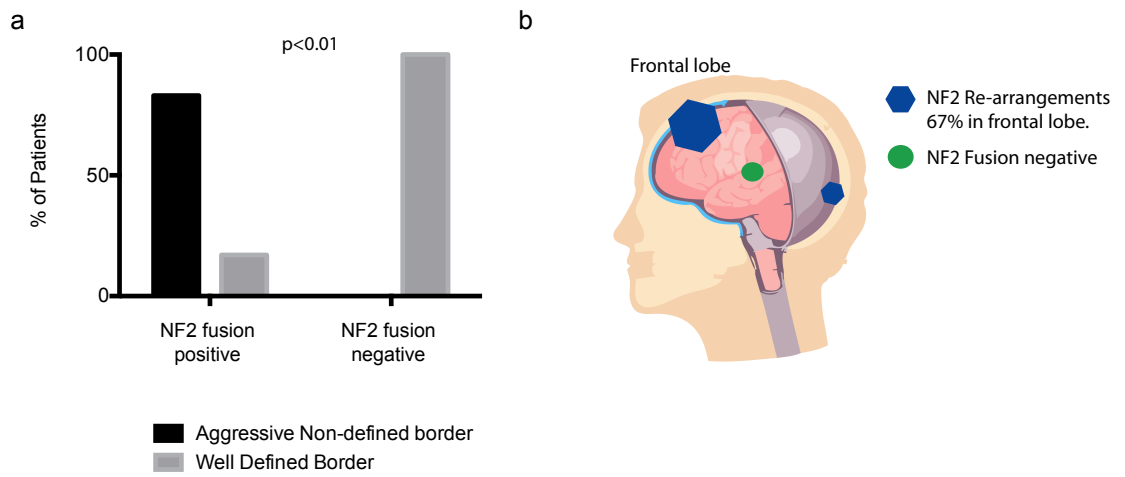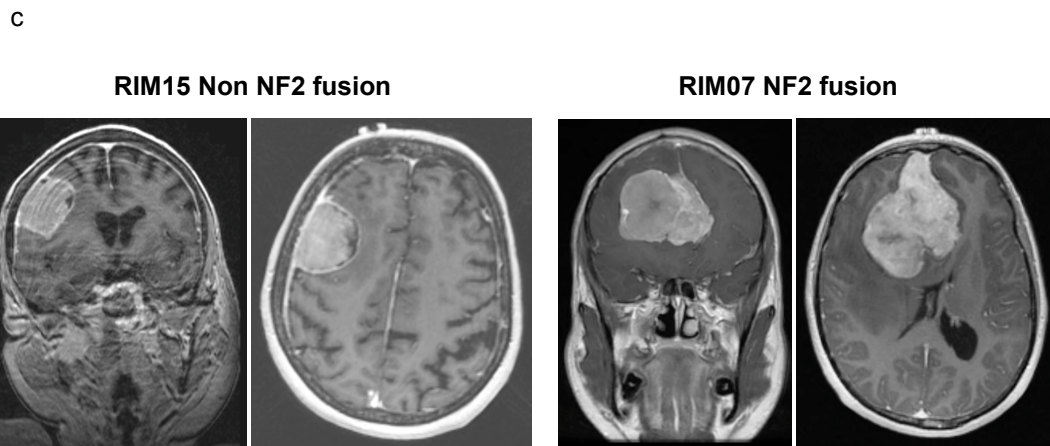

**Supplementary Figure 2**

Correlation of NF2 gene fusion with tumor characteristics.

**(a)** Tumor border definition with respect to NF2 fusion event. **(b)** Schematic representing tumor anatomical position. **(c)** Representative MRIs of RIMs.

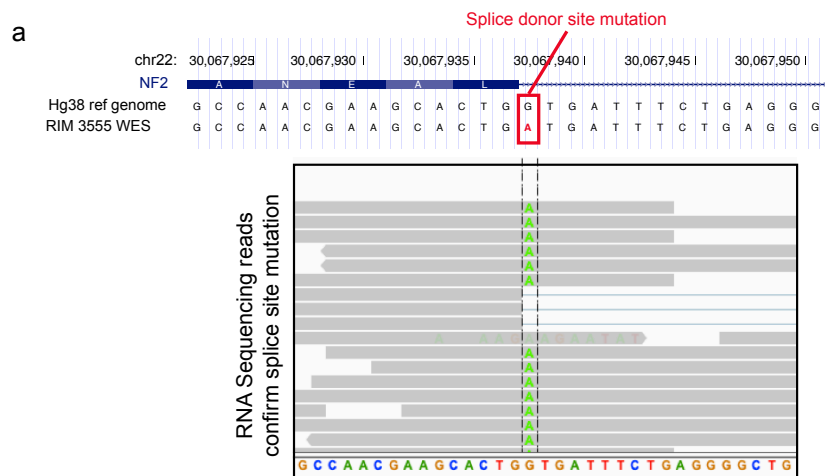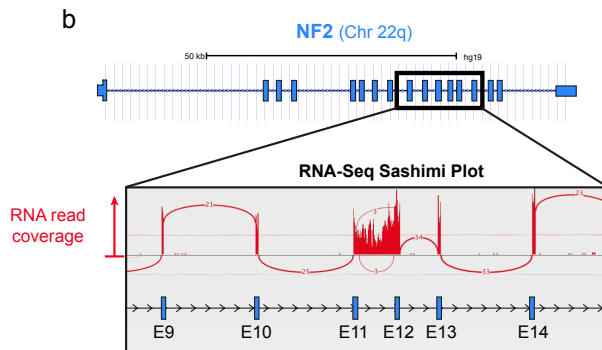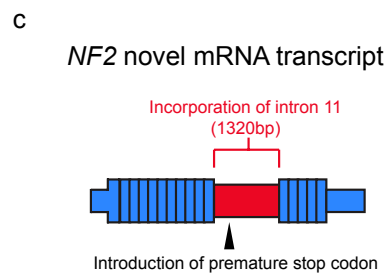

### Supplementary Figure 3

#### Transcriptional consequence of intronic NF2 mutation.

(a) RNA sequencing reads confirm the NF2 splice donor site mutation (G>A) detected by WES. (b) RNA Sequencing reads reveal the failure to splice out intron 11 from the mRNA transcript. (c) Schematic representation of NF2 RNA transcript with inclusion of intron 11.

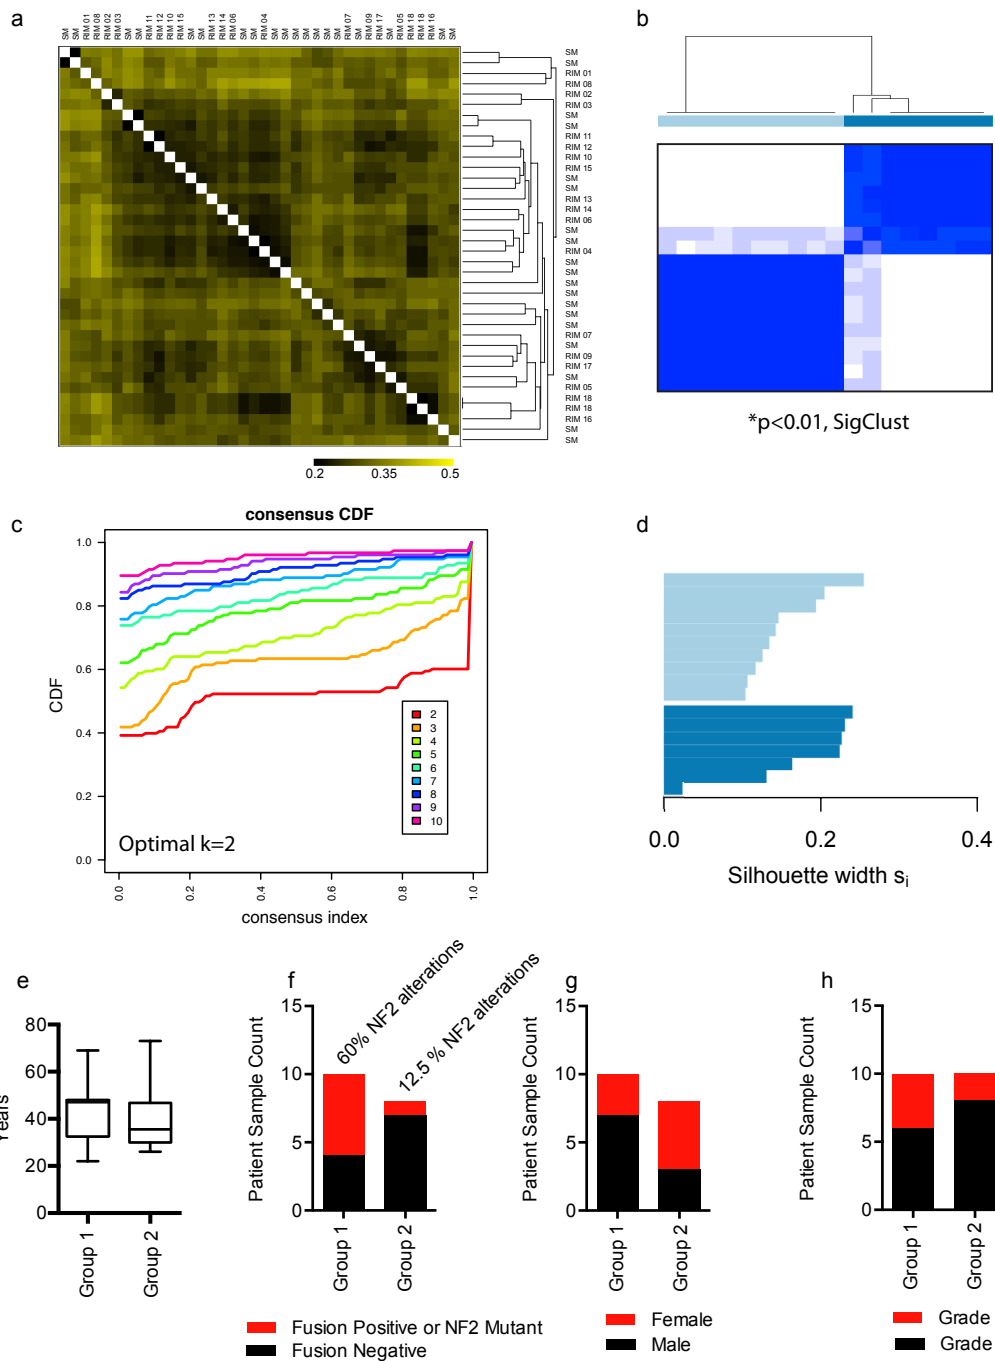

#### Supplementary Figure 4

#### DNA Methylation profiling of Radiation Induced Meningioma.

(a) Sample distance matrix with hierarchical clustering (Pearson correlation). (b) Heatmap of Consensus K-means clustering representing two subgroups. \* $p < 0.05$ , SigClust results. (c) Consensus CDF plot supporting two groups are the most stable as identified through PAC clustering. (d) Silhouette plot of how each sample is representative of their group assignment. Negative values indicate poor group assignment. (e)-(h) Association of methylation sub-groups with clinical characteristics of RIM.

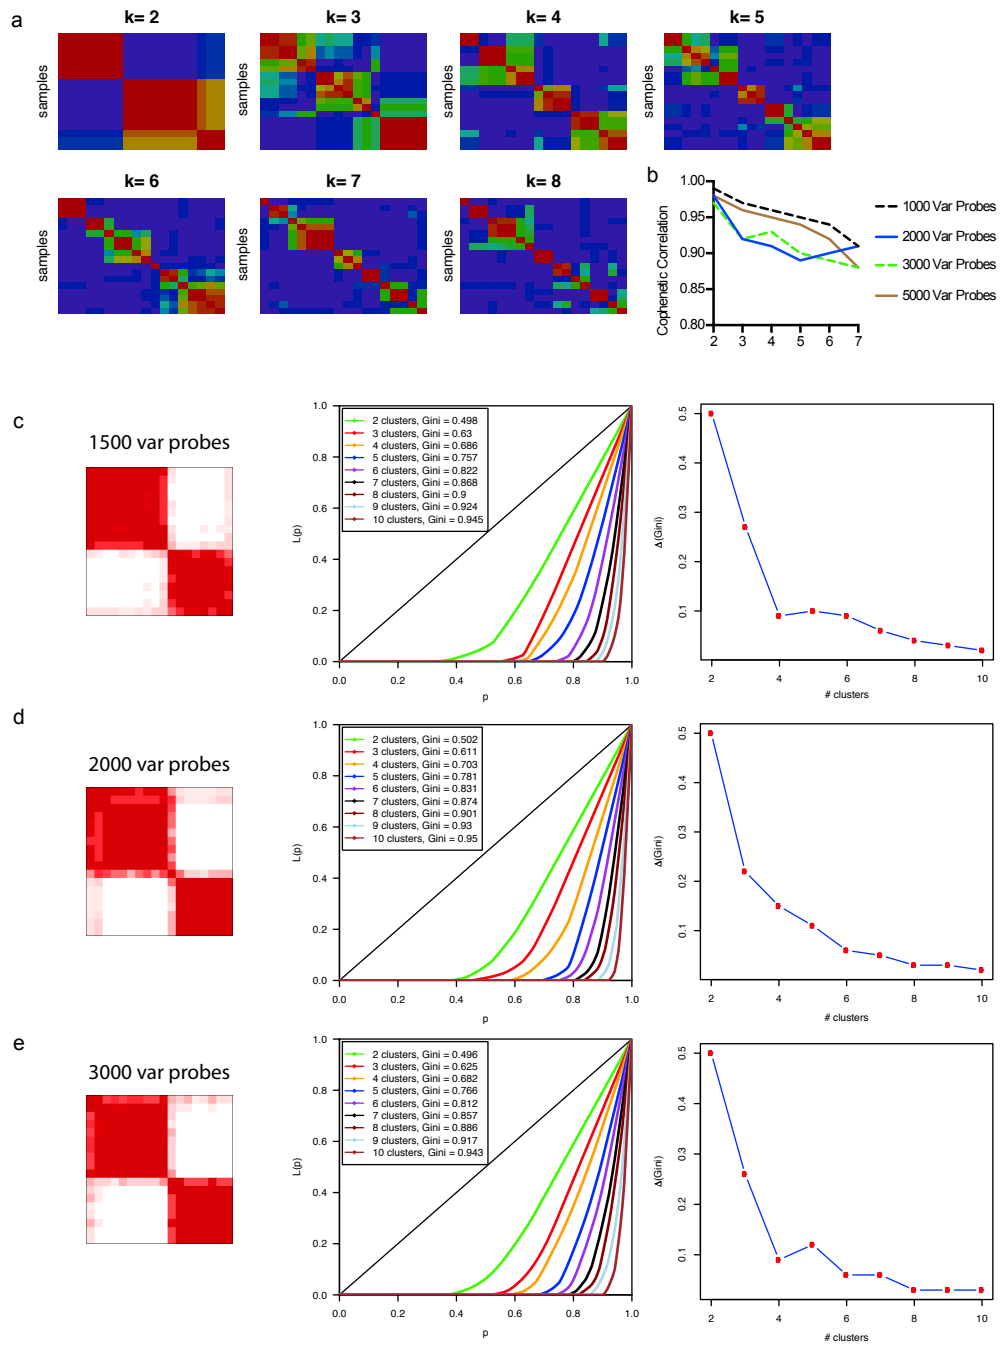

**Supplementary Figure 5**

**Consensus clustering of methylation profiles.**

**(a)** Nonnegative Matrix Factorization (NMF) for 1500 most variable probes supports two groups as depicted by the co-phenetic correlation plot. **(b)** Varying methylated probes still supports two groups as depicted by the co-phenetic correlation plot. **(c)** Consensus hierarchical clustering of 1500 most variable methylated probes supports two groups as depicted by the heatmap (left), Lorenz curve (middle) and Change in Gini plot (right). **(d)** Consensus hierarchical clustering of 2000 most variable methylated probes supports two groups as depicted by the heatmap (left), Lorenz curve (middle) and Change in Gini plot (right). **(e)** Consensus hierarchical clustering of 3000 most variable methylated probes supports two groups as depicted by the heatmap (left), Lorenz curve (middle) and Change in Gini plot (right).

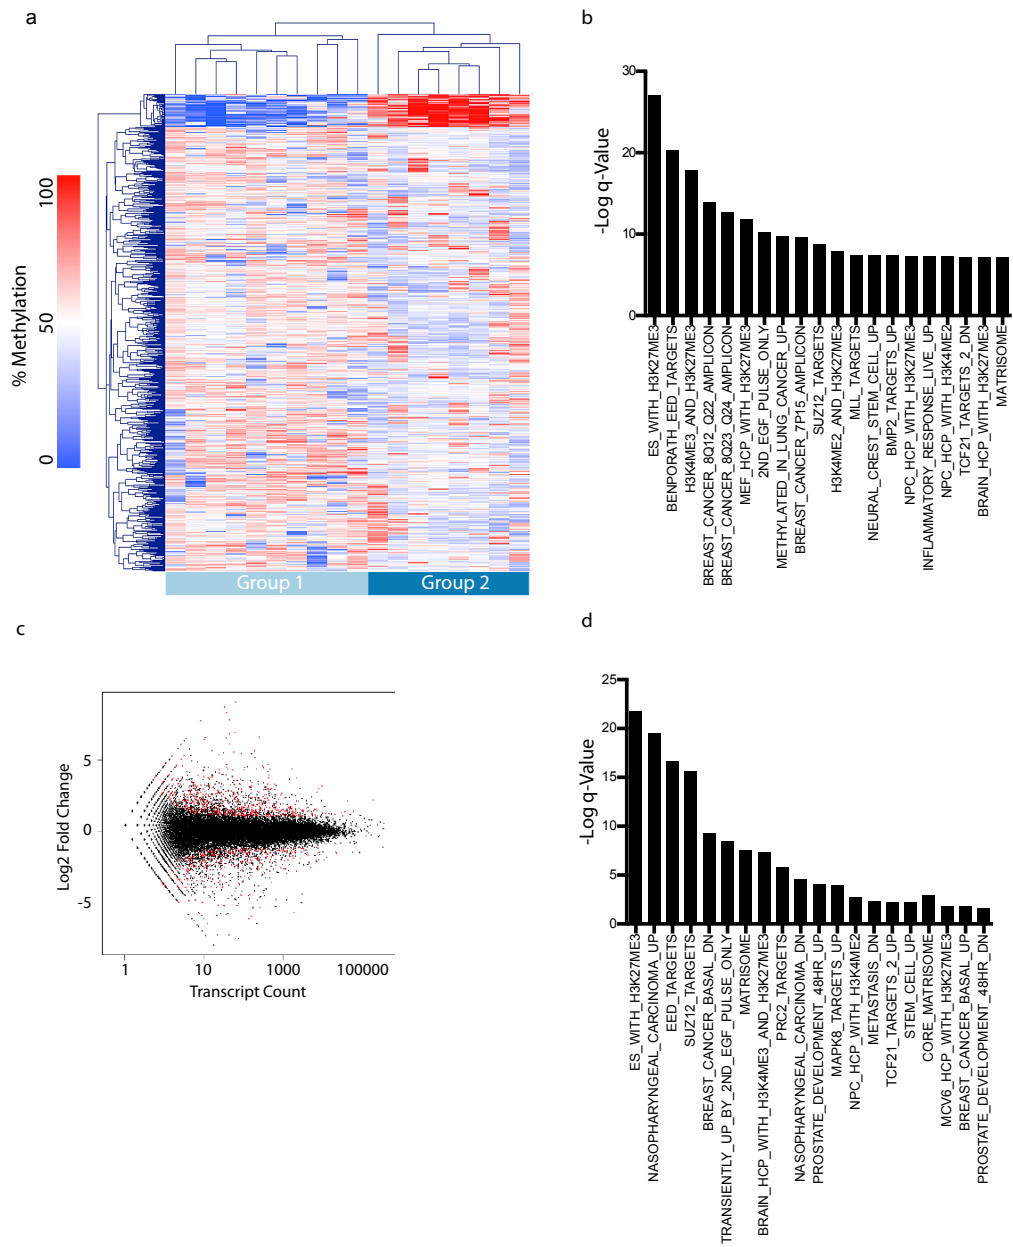

**Supplementary Figure 6**

**Pathway analysis of RIM methylation sub-groups 1 and 2**

**(a)** Hierarchical clustering of significant differentially methylated probes between radiation-induced meningioma methylation groups 1 and 2. Significance was established as: minimum 30% methylation change with an adjusted Bonferroni correct p-value of  $p < 0.05$ . **(b)** GSEA of genes identified in panel a. **(c)** DESeq plot identifying differentially expressed transcripts between radiation-induced meningioma methylation groups 1 and 2. Significance was established as: minimum 2 fold change at the transcript level with an adjusted Bonferroni correct p-value of  $p < 0.05$ . **(d)** GSEA of genes identified in panel c.
